# Supplementary material for: Intense emissions from photoproteins interacting with titanate nanosheets
Source: Royal Society of Chemistry journal article supplement (doi:10.1039/c4ra05665e), 2014-01-01
Supplement: c4ra05665e1.pdf [file c4ra05665e1.pdf]

## Electronic Supplementary Information

### Intense Emission from Photoproteins Interacted with Inorganic Nanosheets

Kai Kamada\*

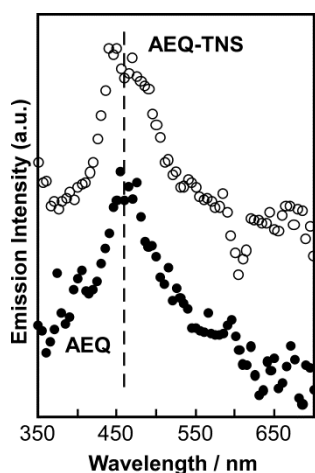

**Figure 1S.** Emission spectra of AEQ solution (0.5 mg/ml, 80  $\mu$ l) with or without TNS (0.19 mg/ml) at pH 8 after addition of  $\text{CaCl}_2$  (100 mM, 60  $\mu$ l).

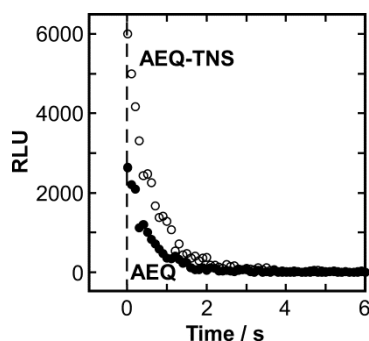

**Figure 2S.** Transient emission curves of mixed solutions (50  $\mu$ l) of AEQ (0.1 mg/ml) and TNS (0 or 11 mM) after dispensing  $\text{CaCl}_2$  solution (100 mM, 15  $\mu$ l).

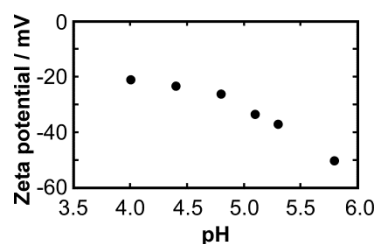

**Figure 3S.** pH dependence of zeta potential of AEQ (0.1 mg/ml). The AEQ stock solution was dissolved into 0.5 mM EDTA, and the solution pH was adjusted by titrating with 0.01 M HCl.

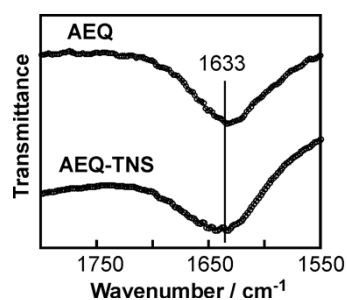

**Figure 4S.** FTIR transmission spectra of free AEQ and AEQ-TNS.

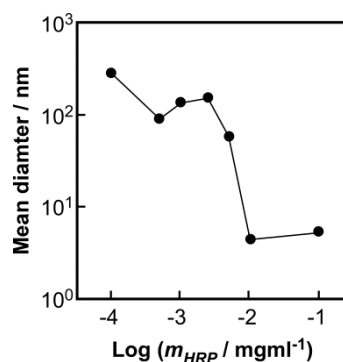

**Figure 5S.** Apparent molecular size of HRP in 20 mM acetate buffer solution (pH 4) as a function of weight concentration.
